# Supplementary material for: Facile synthesis and the phase transition mechanism of fluoridated hydroxyapatite with a hierarchical architecture
Source: Royal Society of Chemistry journal article supplement (doi:10.1039/c7ce01871a), 2017-01-01
Supplement: c7ce01871a1.pdf [file c7ce01871a1.pdf]

# Facile Synthesis and the Phase Transition Mechanism of Fluoridated Hydroxyapatite with Hierarchical Architecture

Liping Wang<sup>a,b</sup>, Ming Wang<sup>a</sup>, Yunli Wang<sup>a</sup>, Yiran Shao<sup>a</sup>, Yingchun Zhu<sup>\*a</sup>

<sup>a</sup> Key Laboratory of Inorganic Coating Materials CAS, Shanghai Institute of Ceramics, Chinese Academy of Sciences, Shanghai 200050, China

<sup>b</sup> University of Chinese Academy of Sciences, Beijing 100049, China

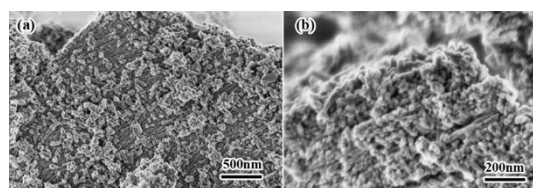

**Fig. S1** SEM images of HA nanocrystals synthesized by hydrothermal process at 150°C for 10 h: (a) oriented HA short rod-like nanoparticles around 100 nm in length are assembled into the plate-like particles in a head-to-tail way; (b) the lateral view shows that HA short-rod nanoparticles are well-organized together<sup>1</sup>.

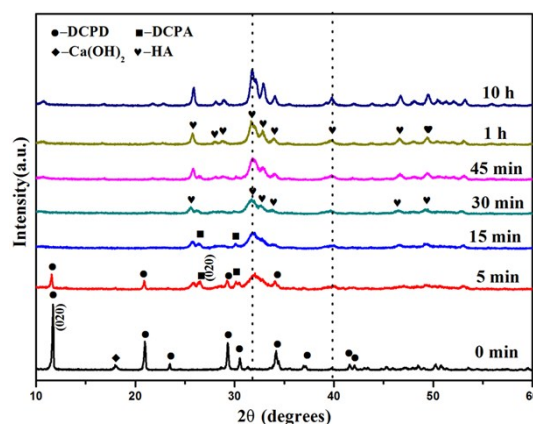

**Fig. S2** XRD spectra of 0-min product at room temperature and products of various hydrothermal reaction time (5, 15, 30, 45, 60 min and 10h) at 150°C when synthesize HA. DCPD is formed at 0 min, DCPA is formed at 5 min and HA is formed at 30 min. The chemical changes have been demonstrated from DCPD to DCPA and further to HA.

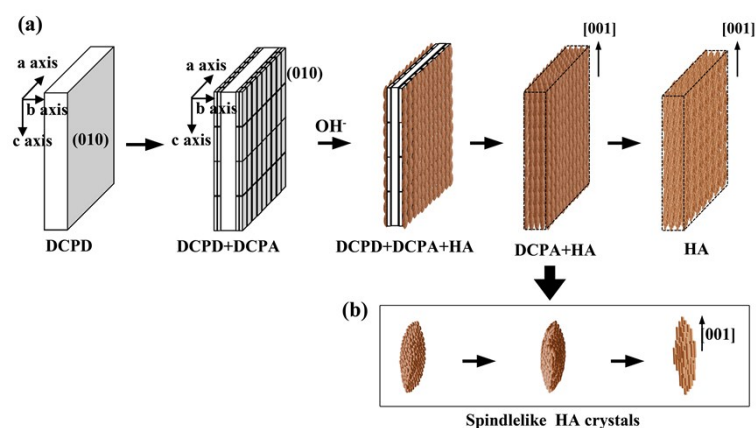

**Fig. S3** The crystal growth schematic illustration of (a) hydrothermal process from DCPD to HA; and (b) HA nanocrystal aggregates on the plate surface. <sup>1</sup>

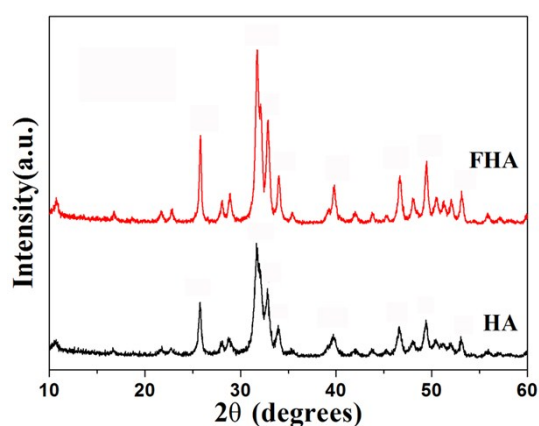

**Fig. S4** XRD spectra of 10-h products of HA in Fig. S2 and the FHA in Fig. 1. The peak intensity of FHA is much greater than HA because of the successful introduction of F<sup>-</sup> in FHA, demonstrating the successful formation of HA and FHA.

| Samples | Lattice constants |           | Size(Å) |
|---------|-------------------|-----------|---------|
|         | a-axis(Å)         | c-axis(Å) |         |
| HA      | 9.418             | 6.884     | 276     |
| FHA     | 9.406             | 6.885     | 264     |

**Table. S1** The lattice constants, sizes of 10-h products of HA in Fig.S2 and FHA in Fig.1. The reduction of the a-axis and size of cell unit for the product of FHA demonstrate the successful formation of FHA.

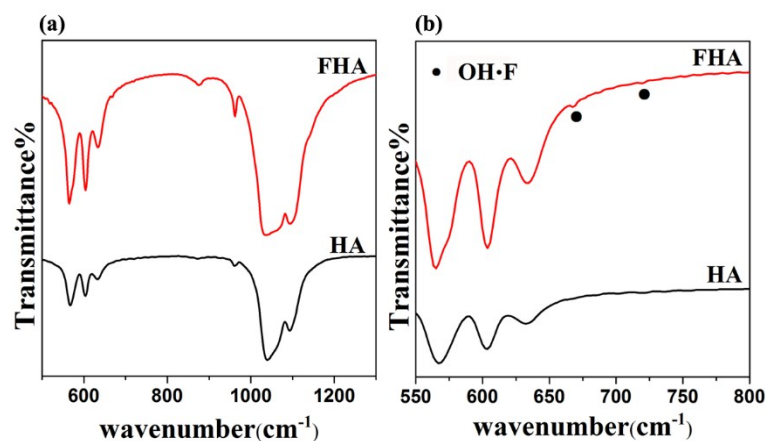

**Fig. S5** FTIR spectra of 10-h products of HA and FHA. The peaks of FHA are much stronger than HA as the formation of FHA. Moreover the peaks at 668 and 718  $\text{cm}^{-1}$  are assigned to the OH • F hydrogen bonds in FHA.

## References

- 1 Wang, M.; Gao, J.; Shi, C.; Zhu, Y.; Zeng, Y.; Wang, D. *Cryst. Growth Des.* 2014, **14**, 6459-6466.
